# Supplementary material for: Risk Factors for Transport-Related Problem Behaviors in Horses: A New Zealand Survey
Source: MDPI journal article supplement (doi:10.3390/ani8080134), 2018-08-02
Supplement: s1 [file s1]

Supplementary file—Survey in the study

1. What is your sex?
  - Male
  - Female
  - Other
2. What section of the horse industry or sport are you primarily involved in?
  - Thoroughbred racing
  - Standardbred racing
  - Pony club
  - Endurance
  - Horse breeding
  - Recreational riding
  - Dressage
  - Show jumping
  - Eventing
  - Reining
  - Showing
  - Polo
  - Other (please specify) \_\_\_\_\_
3. What is your relationship with the horse(s)?
  - Mostly amateur - involved with horses as a hobby or for recreational purposes
  - Mostly professional - involved with horses as part of my job
4. How many years of experience do you have with handling horses?
  - 1–5
  - 6–10
  - 11–20
  - 21–30
  - 31–40
  - 41–50
  - >51
5. Approximately how many horses are kept where you keep your horse(s)?
  - 1–2
  - 3–5
  - 6–10
  - 11–15
  - 16–30
  - >31
6. How do you grade your ability in identifying a horse in distress?
  - 1—low
  - 2—some
  - 3—moderate
  - 4—high
  - 5—very high
7. How often do you transport your horse(s)?
  - Daily

- 2 to 5 times a week
- Once weekly
- Fortnightly
- Monthly
- Less than once a month

8. What is the average kilometers traveled per trip when you have transported your horse(s) in the last year?

- 1–20
- 31–60
- 61–90
- 91–120
- 120–240
- >241

9. How do you usually transport your horse(s)?

- Small truck—2 to 3 horses
- Large truck—more than 3 horses
- Gooseneck
- Float/trailer—angle load
- Float/trailer—straight load
- Use a commercial trucking company

10. In your horse transport vehicle what direction is the horse facing?

- Head facing or angled to the front
- Head facing or angled to the rear
- Horse free and unrestrained

11. Do you use sedation or other product to calm your horse(s) prior to transportation?

- No
- Yes

12. Do you use protective equipment on your horse(s) during transportation? (tick all that apply)

- None
- Leg boots
- Leg bandages
- Poll protector
- Tail guard/bandage
- Neck rug
- Body rug
- Other (please specify) \_\_\_\_\_

13. Have you specifically trained your horse(s) for loading and traveling?

- No
- Yes

14. Please describe the method or the way in which you have trained your horse for loading and traveling:

15. Indicate below if you use any equipment or aids for loading your horse(s)? (tick all that apply)

- Whip
- Bum rope

- Food
- Halter and rope
- Bridle
- Stallion bit
- Load 'n' tie
- Other (please specify) \_\_\_\_\_

16. How do you restrain your horse(s) in the transport vehicle?

- I do not restrain my horse
- Tie up on a short rope
- Tie up on a long rope
- Cross tie
- Hobble
- Other (please specify) \_\_\_\_\_

17. Do you offer food to the horse(s) when travelling?

- No
- Yes—hay
- Yes—grain/complete feed

18. Has your horse(s) shown a behavioural problems associated with transport within the last 2 years? (e.g. anxiety, flight response, fight response, kicking, rearing, refusal to load)

- Yes (please describe) \_\_\_\_\_
- No

19. In which part of the transportation have you noticed the behavioural problem?

- Pre-loading (e.g. vocalisation, pawing, shaking)
- Loading (e.g. refusal to load, rearing, pulling back, kicking, pawing)
- Traveling (e.g. kicking, biting, scrambling, pawing)
- Unloading (e.g. rushing off, freezing)

**Table S1.** Univariate logistic regression Wald's test P values calculated with TRPBs as outcome.

| <b>Predictive variable</b>  | <b>P<sup>a</sup></b> |
|-----------------------------|----------------------|
| Gender                      | 0.701                |
| Sector                      | 0.211                |
| Involvement                 | 0.263                |
| <b>Experience</b>           | <b>0.022</b>         |
| Number of horses            | 0.670                |
| <b>Distress</b>             | <b>0.010</b>         |
| Journey frequency           | 0.325                |
| Journey distance            | 0.926                |
| <b>Vehicle</b>              | <b>0.003</b>         |
| Direction of travel         | 0.211                |
| Sedation                    | 0.152                |
| Protective equipment        | 0.455                |
| Rugs                        | 0.212                |
| Boots                       | 0.569                |
| <b>Training</b>             | <b>0.021</b>         |
| <b>Whip</b>                 | <b>&lt;0.001</b>     |
| Bum rope                    | 0.224                |
| <b>Food</b>                 | <b>&lt;.001</b>      |
| <b>Restraint</b>            | <b>0.022</b>         |
| <b>Food <i>en route</i></b> | <b>&lt;0.001</b>     |
